# Supplementary material for: Major depression epidemiology from a diathesis-stress conceptualization
Source: PubMed Central journal article supplement (PMC3549292; doi:10.1186/1471-244x-13-19), 2013-01-11

## Additional file 6: Model Output

Effect of model parameters on incidence and first episode duration

### Contents

|                                             |   |
|---------------------------------------------|---|
| 1. The stress_sd parameter. ....            | 2 |
| 2. The diathesis_sd parameter. ....         | 3 |
| 3. The threshold parameter .....            | 4 |
| 4. The duration constant parameter.....     | 5 |
| 5. The remission stringency parameter ..... | 6 |

## 1. The stress\_sd parameter.

The stress\_sd variable introduces variability and a right skew to the distribution of stress levels encountered by the agents. At higher levels of stress\_sd agents will be exposed to increasingly high levels of stress. This leads to a higher incidence of major depression, but since episodes occur in the absence of a strong diathesis – the duration of the episodes decreases with increasing values.

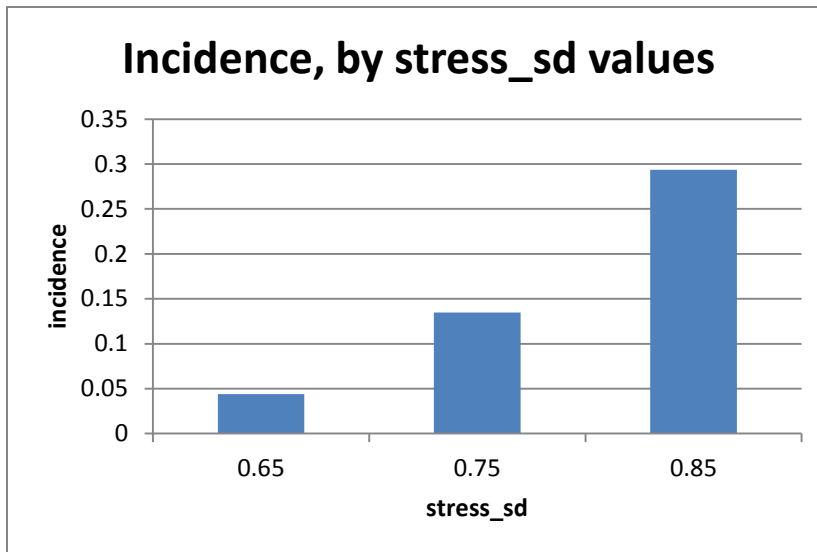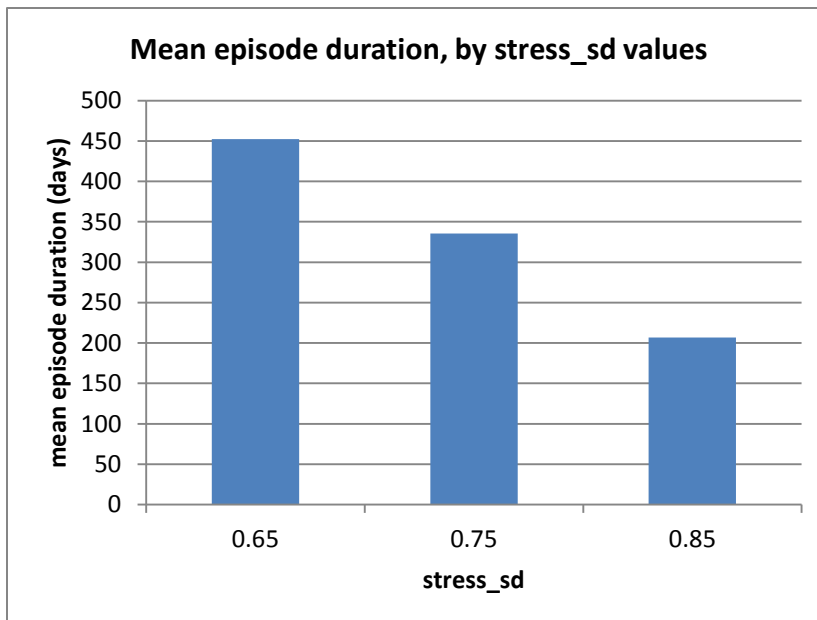

## 2. The diathesis\_sd parameter.

Increasing values of this parameter lead to higher values for the diathesis for some agents, and introduce right skew. The result is a simulated population containing some members with a strong diathesis. Increasing values lead to higher incidence and longer episode duration when an episode occurs.

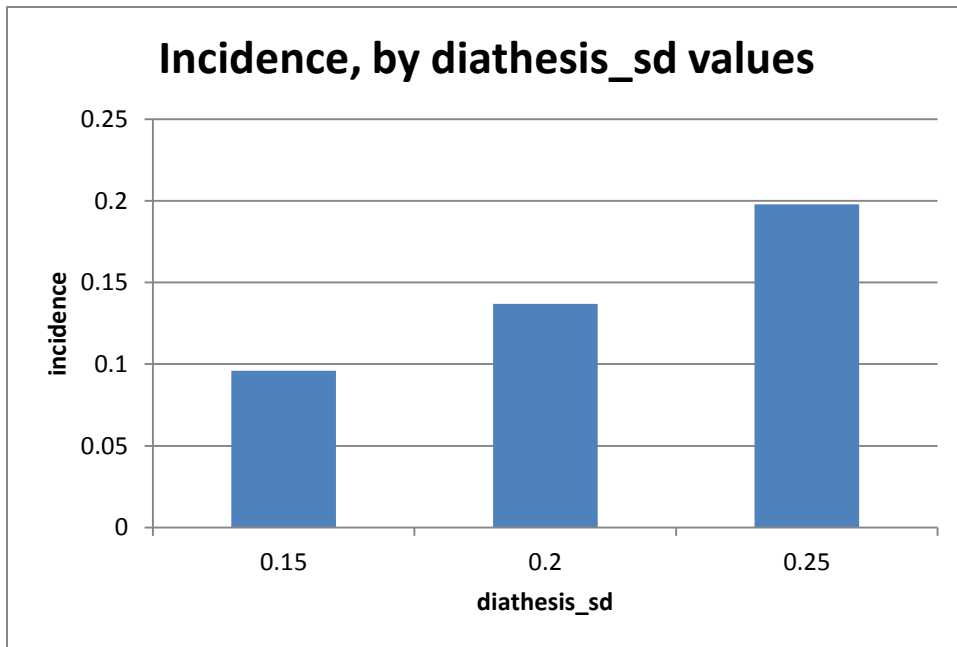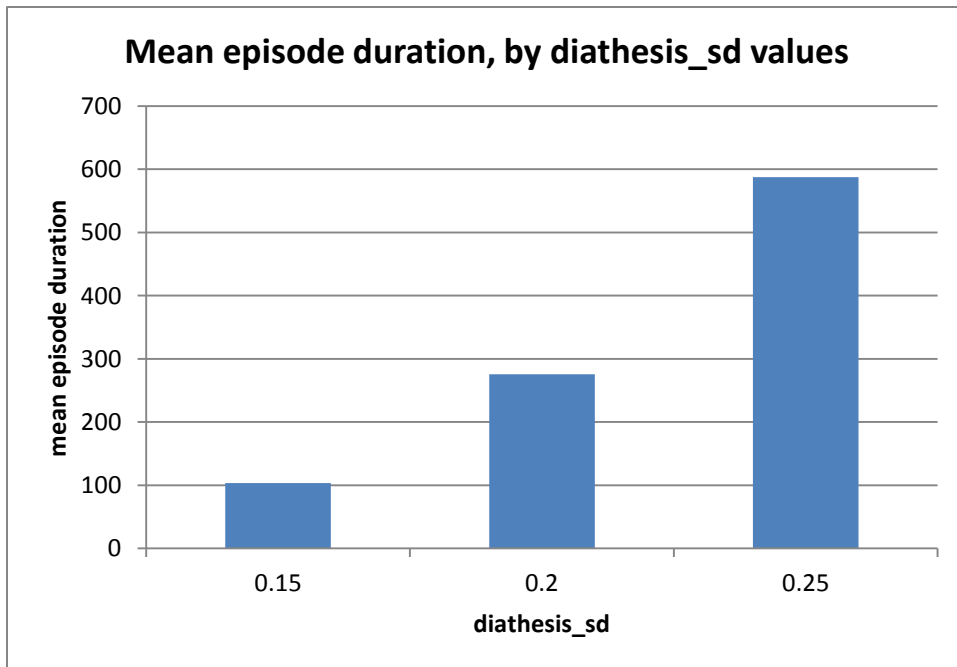

### 3. The threshold parameter

A lower threshold leads to higher incidence and higher episode duration, the latter because the threshold is consistently exceeded by a proportion of the simulated population when the threshold value is low.

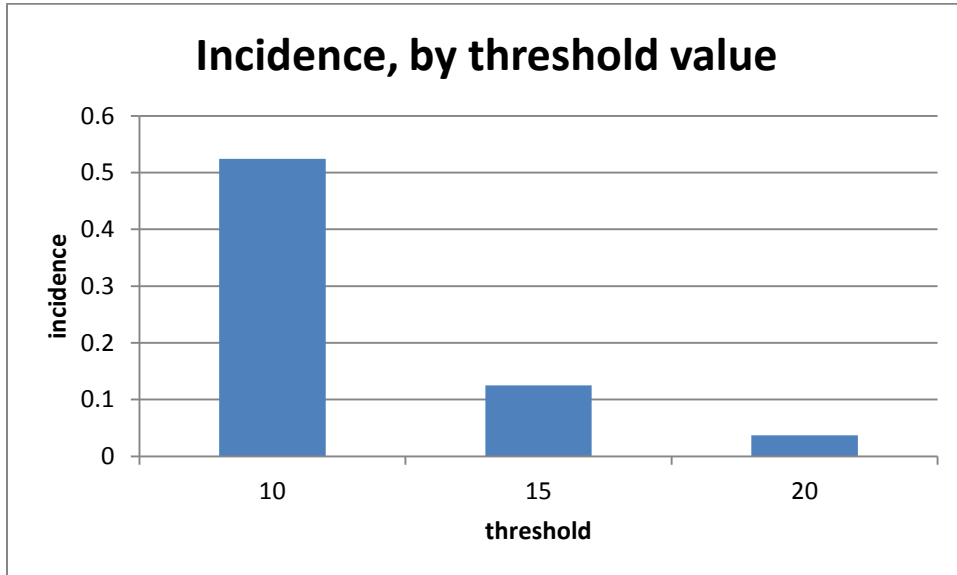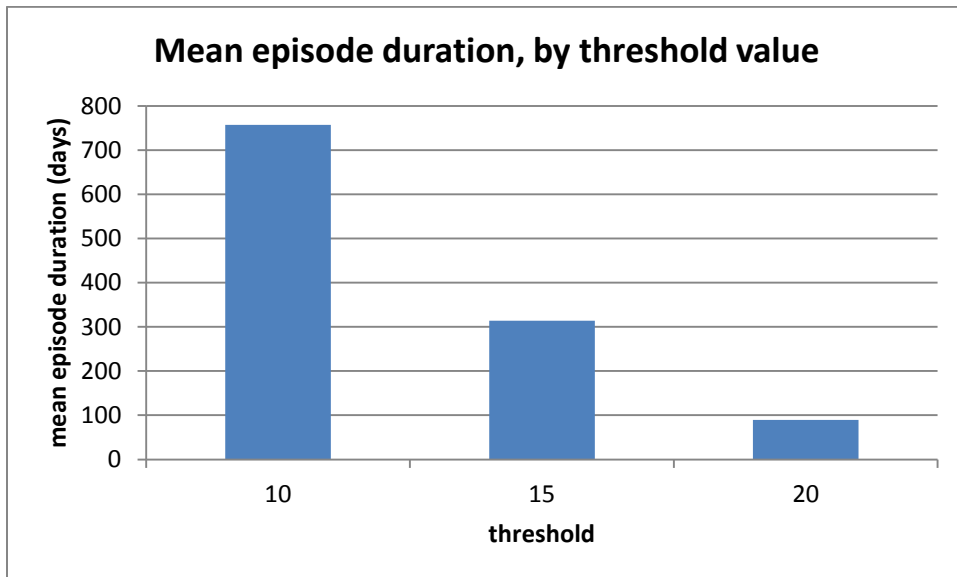

#### 4. The duration constant parameter

The duration constant slows the process of adaptation, as depicted in the model. It has a strong effect on simulated episode duration. There is also a strong effect on incidence, because slow rates of adaptation allow the accumulation of stress burden.

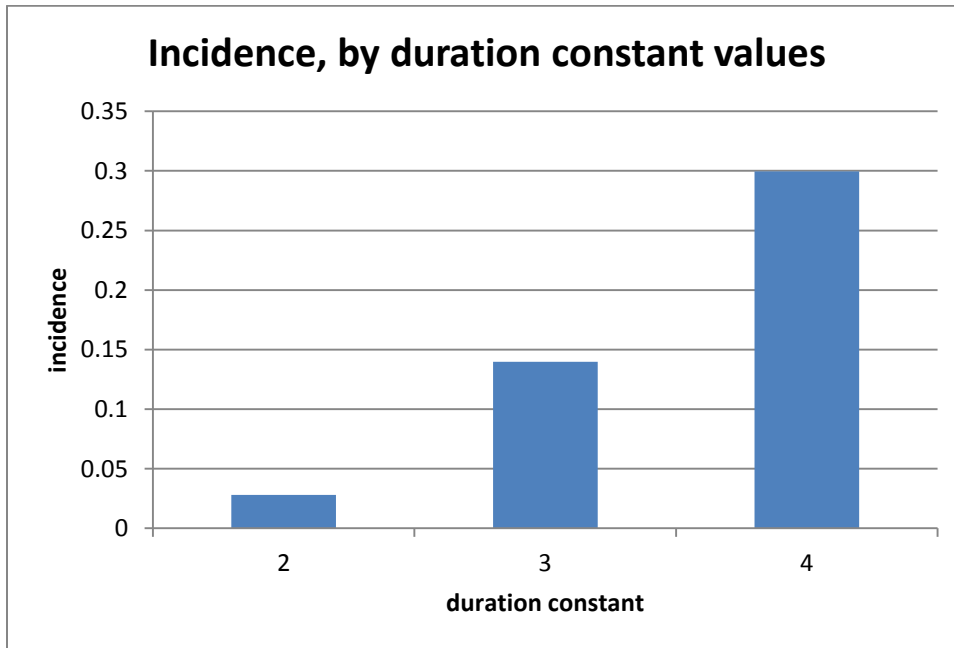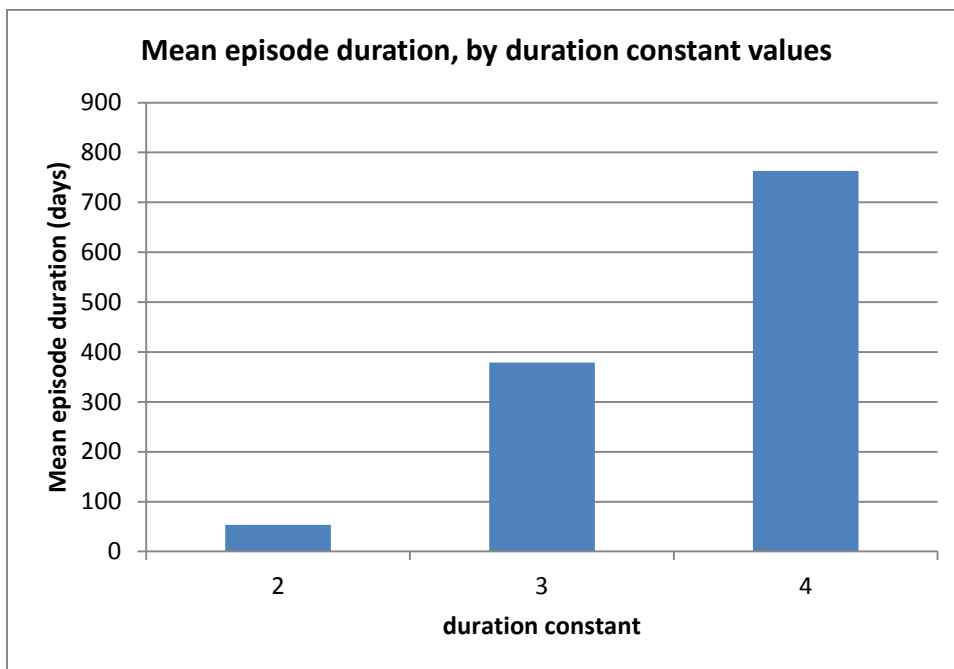

## 5. The remission stringency parameter

The remission stringency parameter does not have a large impact on incidence, but has a large impact on mean episode duration. Very stringent definitions of remission prolong the apparent duration of episodes.

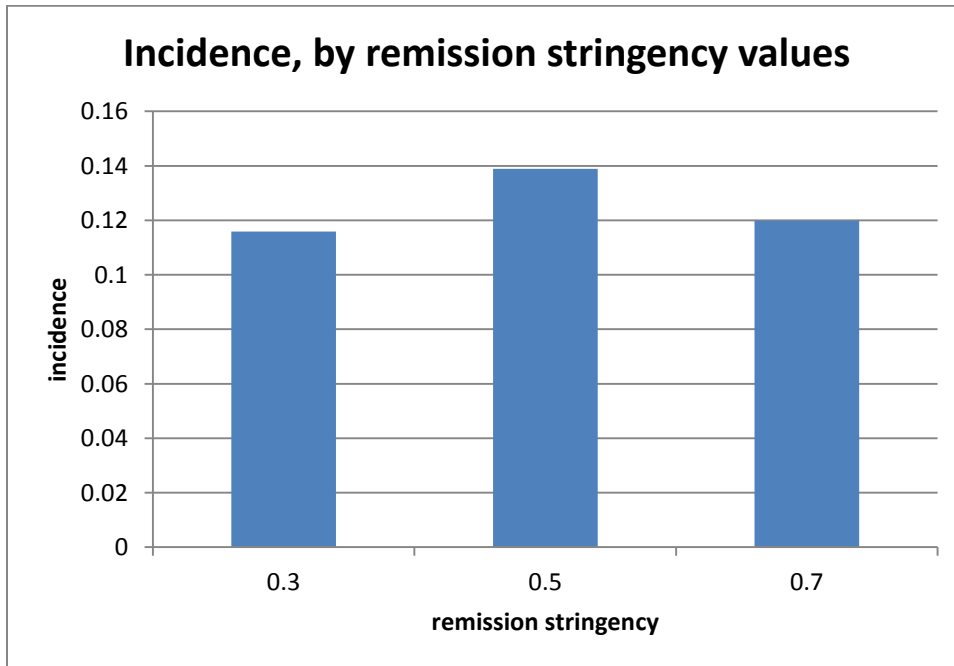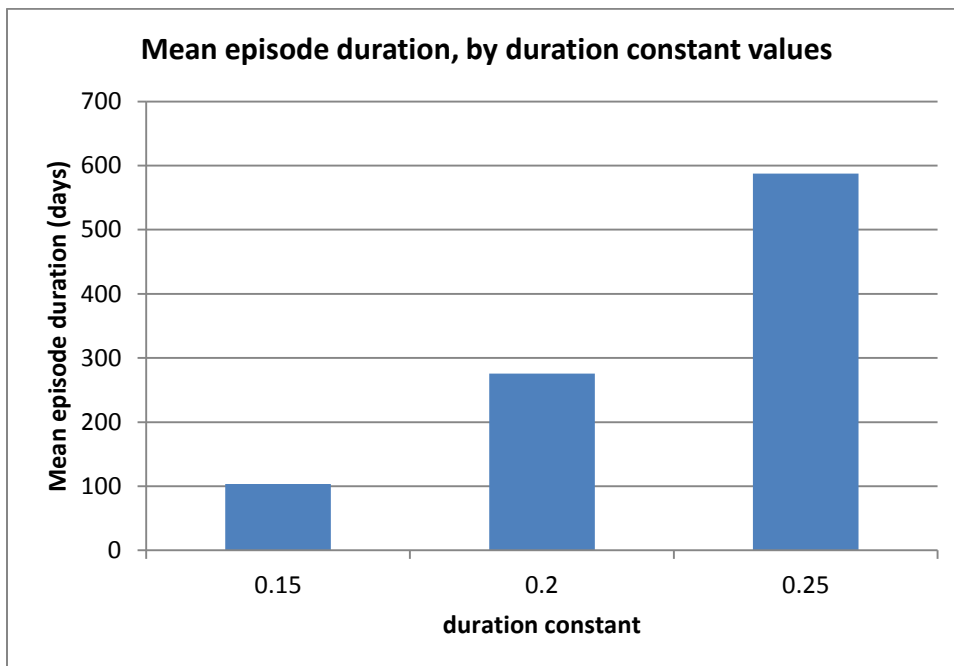

Supplement: 1471-244X-13-19-S6.pdf [file 1471-244X-13-19-S6.pdf]
